# Supplementary material for: Unveiling the Stereoselectivity and Regioselectivity of the [3+2] Cycloaddition Reaction between N-methyl-C-4-methylphenyl-nitrone and 2-Propynamide from a MEDT Perspective
Source: MDPI journal article supplement (doi:10.3390/ijms24109102), 2023-05-22
Supplement: s1 [file s1]

# Unveiling the Stereoselectivity and Regioselectivity of the [3+2] Cycloaddition Reaction between N-methyl-C-4-methylphenyl-nitrone and 2-propynamide with a MEDT Perspective

Sabir A. Mohammed Salih<sup>1</sup>, Huda A. Basheer<sup>1</sup>, Jesus Vicente de Julian Ortiz<sup>2</sup>,

Haydar A. Mohammad-Salim<sup>1,2\*</sup>.

<sup>1</sup>Faculty of Science, Department of Chemistry, University of Zakho, Duhok 42001, Iraq.

<sup>2</sup>Molecular Topology and Drug Design Research Unit, Department of Physical Chemistry, Pharmacy Faculty, University of Valencia, 46100 Valencia, Spain

The equilibrium geometries optimized at DFT B3LYP/6-311++G (d, p) level of all reactants, products and transition states used in this research, as well as, the summary of calculations: are listed below:

## Optimized Geometries for reactants, products and TSs:

### Reactant 1

| Atom | Coordinates (Angstroms) |             |            |
|------|-------------------------|-------------|------------|
|      | X                       | Y           | Z          |
| C    | -2.61835400             | -0.09877900 | 0.00931000 |
| C    | -1.70053900             | -1.15720600 | 0.01286200 |
| C    | -0.32523200             | -0.94021700 | 0.00787900 |
| C    | 0.18383500              | 0.37557400  | 0.00203700 |
| C    | -0.74029300             | 1.44273700  | 0.00330100 |
| C    | -2.10862400             | 1.20865200  | 0.00803400 |
| H    | -2.07067400             | -2.18026200 | 0.02100000 |
| H    | 0.37039000              | -1.76814900 | 0.01224400 |
| H    | -0.37233000             | 2.46677200  | 0.00471500 |

The geometry of the reactant 1

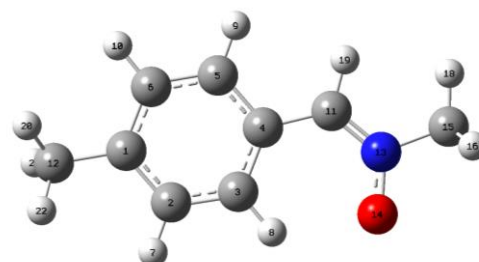

|       |             |             |             |
|-------|-------------|-------------|-------------|
| H     | -2.79570000 | 2.05209400  | 0.01222500  |
| C     | 1.59134000  | 0.71605700  | -0.00049000 |
| C     | -4.10650300 | -0.35245000 | -0.01814200 |
| N     | 2.60641300  | -0.12621700 | -0.00292200 |
| O     | 2.53426200  | -1.40130400 | -0.00285900 |
| C     | 3.99142200  | 0.39437600  | -0.00632800 |
| H     | 4.48969700  | -0.00128400 | 0.88106800  |
| H     | 4.48514800  | -0.00072300 | -0.89651700 |
| H     | 4.01129600  | 1.48553400  | -0.00602800 |
| H     | 1.86412200  | 1.76435000  | -0.00148900 |
| H     | -4.65577400 | 0.41575100  | 0.53739100  |
| H     | -4.49249500 | -0.34547600 | -1.04674600 |
| ----- |             |             |             |

Electronic Energy (EE) = -479.63096 Hartree

Zero-point Energy Correction = 0.181827 Hartree

Thermal Correction to Energy = 0.19245 Hartree

Thermal Correction to Enthalpy = 0.193395 Hartree

Thermal Correction to Free Energy = 0.144683 Hartree

EE + Zero-point Energy = -479.44913 Hartree

EE + Thermal Energy Correction = -479.43851 Hartree

EE + Thermal Enthalpy Correction = -479.43756 Hartree

EE + Thermal Free Energy Correction = -479.48627 Hartree

E (Thermal) = 120.764 kcal/mol

Heat Capacity (Cv) = 39.408 cal/mol-kelvin

Entropy (S) = 102.523 cal/mol-kelvin

## Reactant 2

| Atom  | Coordinates (Angstroms) |             |             |
|-------|-------------------------|-------------|-------------|
|       | X                       | Y           | Z           |
| ----- |                         |             |             |
| C     | 2.17665700              | 0.06959100  | -0.00001900 |
| C     | 0.97094900              | -0.00410500 | -0.00001300 |
| C     | -0.48501300             | -0.14673800 | 0.00000700  |
| N     | -1.15451000             | 1.04367300  | -0.00000800 |
| O     | -1.03747900             | -1.23620400 | 0.000 01900 |
| H     | 3.24281500              | 0.11674700  | -0.00002200 |
| H     | -2.16459800             | 1.02510200  | 0.00004100  |
| H     | -0.67236800             | 1.92958700  | 0.00003400  |

The geometry of the reactant 2

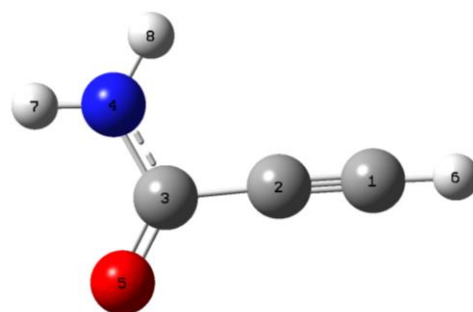

Electronic Energy (EE) = -246.11532 Hartree  
 Zero-point Energy Correction = 0.054762 Hartree  
 Thermal Correction to Energy = 0.060229 Hartree  
 Thermal Correction to Enthalpy = 0.061173 Hartree  
 Thermal Correction to Free Energy = 0.026599 Hartree  
 EE + Zero-point Energy = -246.06056 Hartree  
 EE + Thermal Energy Correction = -246.05509 Hartree  
 EE + Thermal Enthalpy Correction = -246.05415 Hartree  
 EE + Thermal Free Energy Correction = -246.08872 Hartree  
 E (Thermal) = 37.794 kcal/mol  
 Heat Capacity (Cv) = 18.347 cal/mol-kelvin  
 Entropy (S) = 72.766 cal/mol-kelvin

### Product 3

| Atom | Coordinates (Angstroms) |             |             |
|------|-------------------------|-------------|-------------|
|      | X                       | Y           | Z           |
| C    | 3.85500100              | -0.52302800 | -0.21375800 |
| C    | 2.81452300              | -0.81311300 | -1.11149300 |
| C    | 1.50030300              | -0.45259200 | -0.83356800 |
| C    | 1.18235900              | 0.215413 00 | 0.35702400  |
| C    | 2.21207000              | 0.51209200  | 1.25152000  |
| C    | 3.53051500              | 0.14471100  | 0.97066100  |
| H    | 3.04110800              | -1.33037000 | -2.04168500 |
| H    | 0.70870300              | -0.67613700 | -1.54232600 |
| H    | 1.98545600              | 1.03381400  | 2.17929600  |
| H    | 4.31656900              | 0.38520100  | 1.68292800  |

The geometry of the product 3

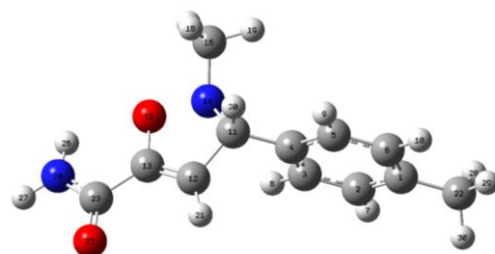

|   |             |             |             |
|---|-------------|-------------|-------------|
| C | -0.25277400 | 0.59211300  | 0.68183400  |
| C | -1.22409000 | -0.55390300 | 0.83920900  |
| C | -2.34810500 | -0.24147900 | 0.19160400  |
| N | -0.86709100 | 1.34126700  | -0.45598300 |
| O | -2.30277800 | 0.96546100  | -0.45631500 |
| C | -0.83262200 | 2.78575400  | -0.29619800 |
| H | -1.34592000 | 3.25572900  | -1.13889900 |
| H | -1.28761100 | 3.12624900  | 0.64769100  |
| H | 0.22002300  | 3.08467500  | -0.31809300 |
| H | -0.24599200 | 1.20369400  | 1.60764500  |
| H | -1.05490500 | -1.44757400 | 1.42110200  |
| C | 5.27870500  | -0.91853400 | -0.52957500 |
| C | -3.60220500 | -1.04246900 | 0.07214200  |
| N | -4.53800900 | -0.49406100 | -0.75421500 |
| O | -3.75287600 | -2.09246300 | 0.68187100  |
| H | -4.32242800 | 0.31510600  | -1.31817200 |
| H | -5.37958500 | -1.02095700 | -0.93709900 |
| H | 5.64173900  | -0.41729000 | -1.43577100 |
| H | 5.95734600  | -0.65832400 | 0.28880100  |
| H | 5.36436400  | -1.99803100 | -0.70487600 |

-----

Electronic Energy (EE) = -725.80209 Hartree

Zero-point Energy Correction = 0.241943 Hartree

Thermal Correction to Energy = 0.257455 Hartree

Thermal Correction to Enthalpy = 0.258399 Hartree

Thermal Correction to Free Energy = 0.197208 Hartree

EE + Zero-point Energy = -725.56015 Hartree

EE + Thermal Energy Correction = -725.54464 Hartree

EE + Thermal Enthalpy Correction = -725.54369 Hartree

EE + Thermal Free Energy Correction = -725.60488 Hartree

E (Thermal) = 161.555 kcal/mol

Heat Capacity (Cv) = 58.11 cal/mol-kelvin

Entropy (S) = 128.787 cal/mol-kelvin

## Product 4

| Atom  | Coordinates (Angstroms) |             |             |
|-------|-------------------------|-------------|-------------|
|       | X                       | Y           | Z           |
| <hr/> |                         |             |             |
| C     | 3.05611840              | -0.21524648 | -0.14610954 |
| C     | 2.10807940              | -0.22284348 | -1.18038554 |
| C     | 0.76674540              | -0.00684248 | -0.89326854 |
| C     | 0.34243740              | 0.22914452  | 0.42035446  |
| C     | 1.29716740              | 0.23456752  | 1.44335246  |
| C     | 2.64282940              | 0.01218352  | 1.17313346  |
| H     | 2.42887640              | -0.40435248 | -2.19880454 |
| H     | 0.03890440              | -0.03419148 | -1.69564154 |
| H     | 0.98389040              | 0.41403452  | 2.46714146  |
| H     | 3.37326840              | 0.01278252  | 1.97278946  |
| C     | -1.12439760             | 0.50407252  | 0.75628946  |
| C     | -2.11453160             | -0.34235448 | -0.02736154 |
| C     | -2.72728560             | 0.46254152  | -0.90809554 |
| N     | -1.63657160             | 1.87996352  | 0.43961646  |
| O     | -2.38331160             | 1.75436552  | -0.82889954 |
| C     | -2.36560060             | -1.79251048 | 0.05451046  |
| O     | -3.24336260             | -2.34168148 | -0.59732754 |
| N     | -1.57920360             | -2.49067048 | 0.94202046  |
| C     | -0.67972760             | 2.95884552  | 0.25102646  |
| H     | -0.70083560             | -2.11791648 | 1.26671846  |
| H     | -1.66986360             | -3.49547348 | 0.91592046  |
| H     | -1.25058960             | 0.38860752  | 1.83775846  |
| H     | 0.05103140              | 2.77653652  | -0.54588854 |

### The geometry of the product 4

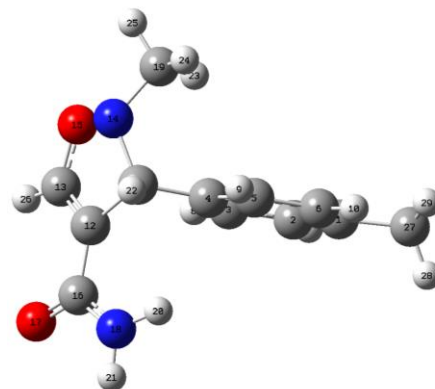

Electronic Energy (EE) = -725.80069 Hartree

Zero-point Energy Correction = 0.242931 Hartree

Thermal Correction to Energy = 0.25814 Hartree

Thermal Correction to Enthalpy = 0.259085 Hartree

Thermal Correction to Free Energy = 0.199381 Hartree

EE + Zero-point Energy = -725.55776 Hartree

EE + Thermal Energy Correction = -725.54255 Hartree

EE + Thermal Enthalpy Correction = -725.5416 Hartree

EE + Thermal Free Energy Correction = -725.60131 Hartree

E (Thermal) = 161.986 kcal/mol

Heat Capacity (Cv) = 57.632 cal/mol-kelvin

Entropy (S) = 125.656 cal/mol-kelvin

|       |             |             |             |
|-------|-------------|-------------|-------------|
| H     | -0.15274360 | 3.09695252  | 1.19727146  |
| H     | -1.23734060 | 3.86996652  | 0.03304346  |
| H     | -3.44895260 | 0.20982252  | -1.67153454 |
| C     | 4.53271457  | -0.37047268 | -0.06223462 |
| H     | 4.88936899  | -1.37928269 | -0.06223462 |
| H     | 4.88938741  | 0.13392551  | 0.81141689  |
| H     | 4.88938741  | 0.13392551  | -0.93588612 |
| ----- |             |             |             |

### Product 5

| Atom  | Coordinates (Angstroms) |             |             |
|-------|-------------------------|-------------|-------------|
|       | X                       | Y           | Z           |
| ----- |                         |             |             |
| C     | -3.41209731             | -0.48175573 | -0.08328083 |
| C     | -3.26356631             | 0.64648027  | 0.73447017  |
| C     | -1.98974631             | 1.09702927  | 1.05967417  |
| C     | -0.84781531             | 0.44121027  | 0.58838217  |
| C     | -1.00804131             | -0.69093673 | -0.21949383 |
| C     | -2.27420831             | -1.14981673 | -0.55903383 |
| H     | -4.14166331             | 1.15743227  | 1.109 79817 |
| H     | -1.88186031             | 1.96981327  | 1.69566117  |
| H     | -0.13511931             | -1.22491473 | -0.57554883 |
| H     | -2.39059331             | -2.02644373 | -1.18437483 |
| C     | 0.53562069              | 0.98433427  | 0.94798817  |
| C     | 1.54636369              | -0.09373973 | 1.25068217  |
| C     | 2.40814969              | -0.16111873 | 0.23637717  |
| N     | 1.26968069              | 1.74806627  | -0.12061583 |
| O     | 2.19282669              | 0.77347427  | -0.73865883 |

The geometry of the product 5

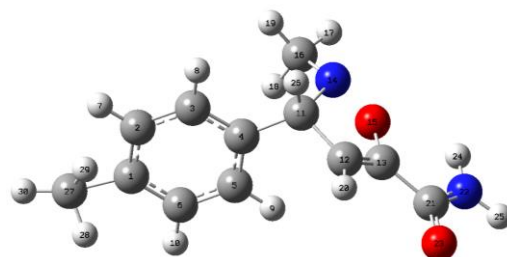

|   |             |             |             |
|---|-------------|-------------|-------------|
| C | 0.49750269  | 2.33027527  | -1.20648883 |
| H | 1.18557869  | 2.84768027  | -1.87591283 |
| H | -0.09177831 | 1.60234027  | -1.77667683 |
| H | -0.17459131 | 3.07070227  | -0.76747383 |
| H | 1.53102069  | -0.74874873 | 2.10632217  |
| C | 3.55004469  | -1.10723073 | 0.04776317  |
| N | 4.32822369  | -0.83855573 | -1.03551283 |
| O | 3.73733369  | -2.03648373 | 0.81319217  |
| H | 4.17278769  | -0.01733873 | -1.59835683 |
| H | 5.13860869  | -1.41483473 | -1.19906383 |
| H | 0.41571069  | 1.68487727  | 1.78008417  |
| C | -4.84684530 | -0.82830382 | -0.26457902 |
| H | -4.49019088 | -1.83711382 | -0.26457902 |
| H | -4.49017246 | -0.32390563 | 0.60907248  |
| H | -5.91684530 | -0.82829063 | -0.26457902 |

Electronic Energy (EE) = -725.79899 Hartree

Zero-point Energy Correction = 0.242276 Hartree

Thermal Correction to Energy = 0.256786 Hartree

Thermal Correction to Enthalpy = 0.257731 Hartree

Thermal Correction to Free Energy = 0.200023 Hartree

EE + Zero-point Energy = -725.55671 Hartree

EE + Thermal Energy Correction = -725.5422 Hartree

EE + Thermal Enthalpy Correction = -725.54126 Hartree

EE + Thermal Free Energy Correction = -725.59896 Hartree

E (Thermal) = 161.136 kcal/mol

Heat Capacity (Cv) = 56.049 cal/mol-kelvin

Entropy (S) = 121.455 cal/mol-kelvin

## Product 6

| Atom | Coordinates (Angstroms) |             |             |
|------|-------------------------|-------------|-------------|
|      | X                       | Y           | Z           |
| C    | 3.07842592              | -0.01049829 | -0.12228563 |
| C    | 2.56483392              | -0.06257029 | 1.17877737  |
| C    | 1.19692292              | -0.23587429 | 1.37266737  |
| C    | 0.32716492              | -0.35319029 | 0.28537237  |
| C    | 0.85019392              | -0.30578029 | -1.01230163 |
| C    | 2.21078392              | -0.13622429 | -1.22004563 |
| H    | 3.23394692              | 0.02574871  | 2.02572337  |

The geometry of the product 6

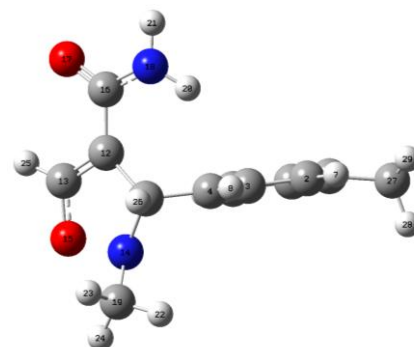

|   |             |             |             |
|---|-------------|-------------|-------------|
| H | 0.80392392  | -0.28423329 | 2.38317537  |
| H | 0.18208092  | -0.41213029 | -1.85808263 |
| H | 2.61231192  | -0.09994329 | -2.22524663 |
| C | -1.16709808 | -0.52799829 | 0.51379337  |
| C | -2.08396508 | 0.52839571  | -0.08951663 |
| C | -3.06388708 | -0.11970229 | -0.73578763 |
| N | -1.63178208 | -1.76409129 | -0.18186263 |
| O | -2.95898308 | -1.45341529 | -0.75043063 |
| C | -2.09253808 | 1.99362171  | 0.08970037  |
| O | -2.99183808 | 2.69432771  | -0.35555563 |
| N | -1.05975508 | 2.52516971  | 0.82455237  |
| C | -1.81826608 | -2.91464629 | 0.68913237  |
| H | -0.19620608 | 2.02095771  | 0.95306537  |
| H | -1.01422608 | 3.53310571  | 0.85127237  |
| H | -0.83334208 | -3.19654329 | 1.06781137  |
| H | -2.48925508 | -2.70634829 | 1.53443637  |
| H | -2.21284208 | -3.74475929 | 0.10350237  |
| H | -3.92890008 | 0.29064371  | -1.23680263 |
| H | -1.33984808 | -0.59701429 | 1.60248737  |
| C | 4.53515118  | -0.11223968 | -0.40347349 |
| H | 4.89180561  | -1.12104968 | -0.40347349 |
| H | 4.89182402  | 0.39215851  | 0.47017801  |
| H | 4.89182402  | 0.39215851  | -1.27712500 |

-----

Electronic Energy (EE) = -725.80431 Hartree

Zero-point Energy Correction = 0.24279 Hartree

Thermal Correction to Energy = 0.258016 Hartree

Thermal Correction to Enthalpy = 0.25896 Hartree

Thermal Correction to Free Energy = 0.199081 Hartree

EE + Zero-point Energy = -725.56151 Hartree

EE + Thermal Energy Correction = -725.54629 Hartree

EE + Thermal Enthalpy Correction = -725.54534 Hartree

EE + Thermal Free Energy Correction = -725.60522 Hartree

E (Thermal) = 161.907 kcal/mol

Heat Capacity (Cv) = 57.56 cal/mol-kelvin

Entropy (S) = 126.026 cal/mol-kelvin



## TS1-en

| Atom | Coordinates (Angstroms) |             |              |
|------|-------------------------|-------------|--------------|
|      | X                       | Y           | Z            |
| C    | 4.03381000              | -0.36478400 | -0.13643200  |
| C    | 3.07904600              | -0.43034100 | -1.15746900  |
| C    | 1.73366400              | -0.18097900 | -0.90637700  |
| C    | 1.29430500              | 0.15353500  | 0.38190400   |
| C    | 2.24579600              | 0.19149200  | 1.41108800   |
| C    | 3.58985100              | -0.05605500 | 1.15402700   |
| H    | 3.39032300              | -0.69544400 | -2.16272 000 |
| H    | 1.01730100              | -0.27629900 | -1.71347600  |
| H    | 1.92761800              | 0.42180800  | 2.42235700   |
| H    | 4.30382400              | -0.01469800 | 1.97025300   |
| C    | -0.12746100             | 0.38606800  | 0.72260500   |
| C    | -1.37887900             | -1.23434500 | 0.13135200   |
| C    | -2.52677000             | -0.76648600 | 0.08268500   |
| N    | -0.89826100             | 1.34347000  | 0.17194500   |
| O    | -2.14540500             | 1.30460100  | 0.53869000   |
| C    | -0.65999900             | 1.92547900  | -1.15041200  |
| H    | -1.04044700             | 1.25117800  | -1.92458800  |
| H    | -1.21206600             | 2.86270300  | -1.18903300  |
| H    | 0.40204700              | 2.11258300  | -1.29780400  |
| H    | -0.40276900             | 0.19544900  | 1.75246600   |
| H    | -0.72640400             | -2.07950400 | 0.05469400   |
| C    | -3.99059600             | -0.81641300 | -0.07063100  |
| N    | -4.62268600             | 0.38403400  | -0.10043700  |

### The geometry of the transition state TS1-en

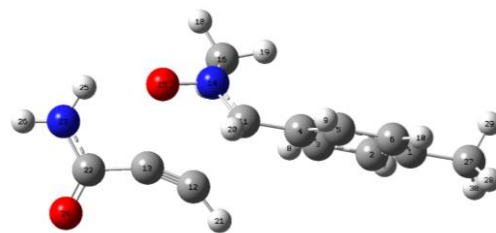

Electronic Energy (EE) = -725.7165 Hartree

Zero-point Energy Correction = 0.238377 Hartree

Thermal Correction to Energy = 0.254514 Hartree

Thermal Correction to Enthalpy = 0.255458 Hartree

Thermal Correction to Free Energy = 0.192273 Hartree

EE + Zero-point Energy = -725.47812 Hartree

EE + Thermal Energy Correction = -725.46199 Hartree

EE + Thermal Enthalpy Correction = -725.46104 Hartree

EE + Thermal Free Energy Correction = -725.52423 Hartree

E (Thermal) = 159.71 kcal/mol

Heat Capacity (Cv) = 59.852 cal/mol-kelvin

Entropy (S) = 132.983 cal/mol-kelvin

|   |             |             |             |
|---|-------------|-------------|-------------|
| O | -4.56123600 | -1.89186000 | -0.17603000 |
| H | -4.09972100 | 1.23199500  | 0.06206200  |
| H | -5.62878800 | 0.38952300  | -0.15024900 |
| C | 5.49537900  | -0.60748400 | -0.41942200 |
| H | 5.99782200  | -1.06117000 | 0.43787000  |
| H | 6.01079700  | 0.33379300  | -0.63997400 |
| H | 5.63133600  | -1.26449300 | -1.28119100 |

### TS1-ex

| Atom | Coordinates (Angstroms) |  |  |
|------|-------------------------|--|--|
|------|-------------------------|--|--|

|  | X | Y | Z |
|--|---|---|---|
|--|---|---|---|

|   |            |             |             |
|---|------------|-------------|-------------|
| C | 2.89907278 | -0.18706532 | -0.12146387 |
| C | 2.17468278 | -1.09403332 | 0.66837713  |
| C | 0.81574278 | -1.27579332 | 0.46371413  |
| C | 0.14875578 | -0.56743232 | -0.55110787 |
| C | 0.88510778 | 0.32923968  | -1.34428987 |
| C | 2.24109778 | 0.52657468  | -1.13278987 |
| H | 2.68463378 | -1.64935532 | 1.44605813  |

The geometry of the transition state  
**TS1-ex**

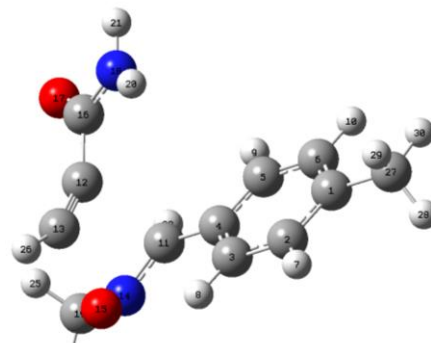

|   |             |             |             |
|---|-------------|-------------|-------------|
| H | 0.25911678  | -1.96078332 | 1.08716513  |
| H | 0.38625778  | 0.87881568  | -2.13490887 |
| H | 2.79585778  | 1.22361768  | -1.74842487 |
| C | -1.27375622 | -0.73409232 | -0.87526087 |
| C | -1.95835649 | 0.71978987  | 0.73588029  |
| C | -2.26176649 | -0.10968213 | 1.61277229  |
| N | -2.06871322 | -1.68903732 | -0.37913387 |
| O | -2.02527522 | -1.88330032 | 0.91580413  |
| C | -1.91311449 | 2.06284887  | 0.17449329  |
| O | -2.62221649 | 2.41056787  | -0.75960171 |
| N | -0.98091449 | 2.89021887  | 0.74028229  |
| C | -3.38248422 | -1.93290332 | -0.98621487 |
| H | -0.50088349 | 2.63260187  | 1.58671929  |
| H | -0.95335349 | 3.84988187  | 0.43101229  |
| H | -1.57526322 | -0.36982932 | -1.85134187 |
| H | -3.69285222 | -2.93987432 | -0.71358387 |
| H | -3.31124422 | -1.84770732 | -2.06984587 |
| H | -4.09822722 | -1.20530732 | -0.59322087 |
| H | -2.63788349 | -0.42081513 | 2.56388529  |
| C | 4.32957307  | -0.09364775 | 0.27402126  |
| H | 4.68622749  | -1.10245776 | 0.27402126  |
| H | 4.68624591  | 0.41075044  | 1.14767277  |
| H | 4.68624591  | 0.41075044  | -0.59963024 |

Electronic Energy (EE) = -725.71739 Hartree

Zero-point Energy Correction = 0.238299 Hartree

Thermal Correction to Energy = 0.254368 Hartree

Thermal Correction to Enthalpy = 0.255312 Hartree

Thermal Correction to Free Energy = 0.193518 Hartree

EE + Zero-point Energy = -725.47909 Hartree

EE + Thermal Energy Correction = -725.46302 Hartree

EE + Thermal Enthalpy Correction = -725.46208 Hartree

EE + Thermal Free Energy Correction = -725.52387 Hartree

E (Thermal) = 159.619 kcal/mol

Heat Capacity (Cv) = 59.925 cal/mol-kelvin

Entropy (S) = 130.058 cal/mol-kelvin

-----

## TS2-en

| Atom | Coordinates (Angstroms) |             |             |
|------|-------------------------|-------------|-------------|
|      | X                       | Y           | Z           |
| C    | -3.59426495             | -0.58630386 | -0.16283626 |
| C    | -3.43744595             | 0.42363114  | 0.78896074  |
| C    | -2.22554695             | 1.09418514  | 0.92794874  |
| C    | -1.12277295             | 0.76984214  | 0.12624174  |
| C    | -1.27250095             | -0.25192786 | -0.82601526 |
| C    | -2.49040095             | -0.90256286 | -0.96725626 |
| H    | -4.27300095             | 0.69623314  | 1.42528874  |
| H    | -2.13916495             | 1.88570914  | 1.66624874  |
| H    | -0.42857395             | -0.52583986 | -1.44268726 |
| H    | -2.58422595             | -1.68481686 | -1.71425426 |
| C    | 0.11621005              | 1.54468514  | 0.33241474  |
| C    | 1.21328405              | 0.14003314  | 1.50455274  |
| C    | 1.94960605              | -0.46394086 | 0.70790274  |
| N    | 1.09598305              | 1.68095814  | -0.58480026 |
| O    | 1.54587505              | 0.58338914  | -1.12139926 |
| C    | 2.10426705              | 2.73015414  | -0.40454026 |
| H    | 2.55877905              | 2.92779314  | -1.37401226 |
| H    | 1.63673405              | 3.63971414  | -0.02784026 |
| H    | 2.87084705              | 2.37619714  | 0.29266674  |
| H    | 0.82902105              | 0.23705114  | 2.49864474  |
| C    | 2.90463205              | -1.50654186 | 0.29783874  |
| N    | 3.45950905              | -1.34725386 | -0.93149926 |
| O    | 3.17056805              | -2.43006386 | 1.05194174  |

### The geometry of the transition state TS2-en

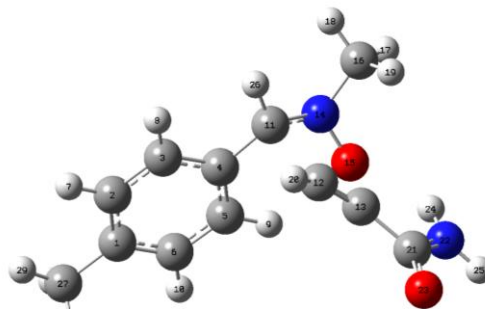

Electronic Energy (EE) = -725.7181 Hartree

Zero-point Energy Correction = 0.237742 Hartree

Thermal Correction to Energy = 0.25438 Hartree

Thermal Correction to Enthalpy = 0.255325 Hartree

Thermal Correction to Free Energy = 0.191479 Hartree

EE + Zero-point Energy = -725.48036 Hartree

EE + Thermal Energy Correction = -725.46372 Hartree

EE + Thermal Enthalpy Correction = -725.46277 Hartree

EE + Thermal Free Energy Correction = -725.52662 Hartree

E (Thermal) = 159.626 kcal/mol

Heat Capacity (Cv) = 60.365 cal/mol-kelvin

Entropy (S) = 134.374 cal/mol-kelvin

|       |             |             |             |
|-------|-------------|-------------|-------------|
| H     | 3.13444005  | -0.60953086 | -1.53869026 |
| H     | 4.08332805  | -2.06378086 | -1.26668726 |
| H     | -0.01843795 | 2.43332514  | 0.94246174  |
| C     | -4.90251195 | -1.31949986 | -0.32458526 |
| H     | -4.77881295 | -2.39169186 | -0.14310626 |
| H     | -5.65707995 | -0.94696186 | 0.37094574  |
| H     | -5.29576995 | -1.20722086 | -1.33976226 |
| ----- |             |             |             |

### TS2-ex

| Atom  | Coordinates (Angstroms) |             |             |
|-------|-------------------------|-------------|-------------|
|       | X                       | Y           | Z           |
| ----- |                         |             |             |
| C     | 3.35130200              | 0.07823600  | -0.05469600 |
| C     | 2.90999800              | -0.29446500 | 1.22011400  |
| C     | 1.57516000              | -0.60269700 | 1.45341200  |
| C     | 0.63602700              | -0.57032700 | 0.41092800  |
| C     | 1.06864600              | -0.16716100 | -0.86061900 |
| C     | 2.40454800              | 0.14671500  | -1.08295300 |
| H     | 3.61781000              | -0.33541600 | 2.04166200  |
| H     | 1.25541900              | -0.88092300 | 2.45216400  |

The geometry of the transition state  
**TS2-ex**

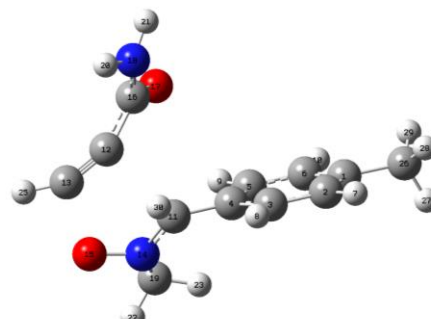

|   |             |             |             |
|---|-------------|-------------|-------------|
| H | 0.35062800  | -0.03763900 | -1.65983900 |
| H | 2.71147300  | 0.47494500  | -2.07053400 |
| C | -0.76379600 | -0.89151600 | 0.72550400  |
| C | -2.37833600 | 0.72674600  | 0.04828300  |
| C | -3.33805400 | -0.06806100 | 0.04941000  |
| N | -1.50946000 | -1.80623400 | 0.11206800  |
| O | -2.78665200 | -1.80307200 | 0.43426500  |
| C | -1.74440400 | 1.99665500  | -0.21265500 |
| O | -1.18855200 | 2.25512100  | -1.27449400 |
| N | -1.74229600 | 2.88286300  | 0.84331700  |
| C | -1.21531000 | -2.38184900 | -1.20152200 |
| H | -2.40042200 | 2.76295300  | 1.59682400  |
| H | -1.42217300 | 3.81827600  | 0.64106000  |
| H | -1.74561400 | -3.33058900 | -1.25884000 |
| H | -0.14397800 | -2.54086100 | -1.30790300 |
| H | -1.57986100 | -1.71267200 | -1.98562500 |
| H | -4.37505800 | -0.30366500 | -0.07308300 |
| C | 4.80341200  | 0.39311100  | -0.31389600 |
| H | 5.34372100  | -0.50210200 | -0.64142800 |
| H | 5.29882200  | 0.76288200  | 0.58659200  |
| H | 4.91376700  | 1.14567800  | -1.09790000 |
| H | -1.11577400 | -0.66598300 | 1.72312500  |

Electronic Energy (EE) = -725.71718 Hartree

Zero-point Energy Correction = 0.238416 Hartree

Thermal Correction to Energy = 0.25463 Hartree

Thermal Correction to Enthalpy = 0.255574 Hartree

Thermal Correction to Free Energy = 0.193433 Hartree

EE + Zero-point Energy = -725.47877 Hartree

EE + Thermal Energy Correction = -725.46255 Hartree

EE + Thermal Enthalpy Correction = -725.46161 Hartree

EE + Thermal Free Energy Correction = -725.52375 Hartree

E (Thermal) = 159.783 kcal/mol

Heat Capacity (Cv) = 59.966 cal/mol-kelvin

Entropy (S) = 130.786 cal/mol-kelvin

## Wiberg bond index matrix in the NAO basis for TSs:

TS1-en

| Atom  | 1      | 2      | 3      | 4      | 5      | 6      | 7      | 8      | 9      |
|-------|--------|--------|--------|--------|--------|--------|--------|--------|--------|
| ----  | -----  | -----  | -----  | -----  | -----  | -----  | -----  | -----  | -----  |
| 1. C  | 0.0000 | 1.3811 | 0.0133 | 0.0989 | 0.0135 | 1.4075 | 0.0036 | 0.0085 | 0.0082 |
| 2. C  | 1.3811 | 0.0000 | 1.4663 | 0.0129 | 0.1071 | 0.0122 | 0.9249 | 0.0039 | 0.0006 |
| 3. C  | 0.0133 | 1.4663 | 0.0000 | 1.3589 | 0.0134 | 0.1030 | 0.0035 | 0.9234 | 0.0103 |
| 4. C  | 0.0989 | 0.0129 | 1.3589 | 0.0000 | 1.3852 | 0.0128 | 0.0089 | 0.0032 | 0.0033 |
| 5. C  | 0.0135 | 0.1071 | 0.0134 | 1.3852 | 0.0000 | 1.4375 | 0.0005 | 0.0100 | 0.9248 |
| 6. C  | 1.4075 | 0.0122 | 0.1030 | 0.0128 | 1.4375 | 0.0000 | 0.0103 | 0.0006 | 0.0036 |
| 7. H  | 0.0036 | 0.9249 | 0.0035 | 0.0089 | 0.0005 | 0.0103 | 0.0000 | 0.0034 | 0.0006 |
| 8. H  | 0.0085 | 0.0039 | 0.9234 | 0.0032 | 0.0100 | 0.0006 | 0.0034 | 0.0000 | 0.0005 |
| 9. H  | 0.0082 | 0.0006 | 0.0103 | 0.0033 | 0.9248 | 0.0036 | 0.0006 | 0.0005 | 0.0000 |
| 10. H | 0.0037 | 0.0105 | 0.0005 | 0.0085 | 0.0034 | 0.9249 | 0.0005 | 0.0006 | 0.0033 |
| 11. C | 0.0020 | 0.0093 | 0.0120 | 1.0578 | 0.0144 | 0.0089 | 0.0003 | 0.0017 | 0.0019 |
| 12. C | 0.0041 | 0.0004 | 0.0056 | 0.0034 | 0.0117 | 0.0005 | 0.0000 | 0.0006 | 0.0001 |
| 13. C | 0.0002 | 0.0002 | 0.0008 | 0.0032 | 0.0006 | 0.0007 | 0.0000 | 0.0002 | 0.0000 |
| 14. N | 0.0083 | 0.0010 | 0.0149 | 0.0101 | 0.0168 | 0.0006 | 0.0001 | 0.0003 | 0.0003 |
| 15. O | 0.0065 | 0.0005 | 0.0095 | 0.0148 | 0.0106 | 0.0008 | 0.0001 | 0.0004 | 0.0004 |
| 16. C | 0.0005 | 0.0011 | 0.0019 | 0.0012 | 0.0010 | 0.0005 | 0.0000 | 0.0005 | 0.0000 |
| 17. H | 0.0003 | 0.0001 | 0.0007 | 0.0002 | 0.0004 | 0.0000 | 0.0000 | 0.0002 | 0.0000 |
| 18. H | 0.0002 | 0.0001 | 0.0005 | 0.0003 | 0.0003 | 0.0002 | 0.0000 | 0.0001 | 0.0000 |
| 19. H | 0.0001 | 0.0002 | 0.0016 | 0.0006 | 0.0002 | 0.0001 | 0.0000 | 0.0000 | 0.0000 |
| 20. H | 0.0009 | 0.0002 | 0.0085 | 0.0024 | 0.0021 | 0.0004 | 0.0003 | 0.0002 | 0.0003 |
| 21. H | 0.0000 | 0.0000 | 0.0005 | 0.0003 | 0.0001 | 0.0000 | 0.0000 | 0.0000 | 0.0000 |
| 22. C | 0.0002 | 0.0000 | 0.0003 | 0.0001 | 0.0004 | 0.0000 | 0.0000 | 0.0000 | 0.0000 |
| 23. N | 0.0001 | 0.0000 | 0.0001 | 0.0001 | 0.0001 | 0.0000 | 0.0000 | 0.0000 | 0.0000 |
| 24. O | 0.0000 | 0.0000 | 0.0001 | 0.0003 | 0.0000 | 0.0001 | 0.0000 | 0.0000 | 0.0000 |

|     |   |        |        |        |        |        |        |        |        |
|-----|---|--------|--------|--------|--------|--------|--------|--------|--------|
| 25. | H | 0.0000 | 0.0000 | 0.0000 | 0.0001 | 0.0000 | 0.0000 | 0.0000 | 0.0000 |
| 26. | H | 0.0000 | 0.0000 | 0.0000 | 0.0000 | 0.0000 | 0.0000 | 0.0000 | 0.0000 |
| 27. | C | 1.0352 | 0.0110 | 0.0097 | 0.0015 | 0.0088 | 0.0109 | 0.0027 | 0.0004 |
| 28. | H | 0.0020 | 0.0074 | 0.0003 | 0.0001 | 0.0005 | 0.0019 | 0.0004 | 0.0003 |
| 29. | H | 0.0025 | 0.0058 | 0.0002 | 0.0038 | 0.0002 | 0.0124 | 0.0001 | 0.0000 |
| 30. | H | 0.0025 | 0.0067 | 0.0002 | 0.0044 | 0.0002 | 0.0126 | 0.0001 | 0.0000 |

| Atom | 10    | 11     | 12     | 13     | 14     | 15     | 16     | 17     | 18     |
|------|-------|--------|--------|--------|--------|--------|--------|--------|--------|
| ---- | ----- | -----  | -----  | -----  | -----  | -----  | -----  | -----  | -----  |
| 1.   | C     | 0.0037 | 0.0020 | 0.0041 | 0.0002 | 0.0083 | 0.0065 | 0.0005 | 0.0003 |
| 2.   | C     | 0.0105 | 0.0093 | 0.0004 | 0.0002 | 0.0010 | 0.0005 | 0.0011 | 0.0001 |
| 3.   | C     | 0.0005 | 0.0120 | 0.0056 | 0.0008 | 0.0149 | 0.0095 | 0.0019 | 0.0007 |
| 4.   | C     | 0.0085 | 1.0578 | 0.0034 | 0.0032 | 0.0101 | 0.0148 | 0.0012 | 0.0002 |
| 5.   | C     | 0.0034 | 0.0144 | 0.0117 | 0.0006 | 0.0168 | 0.0106 | 0.0010 | 0.0004 |
| 6.   | C     | 0.9249 | 0.0089 | 0.0005 | 0.0007 | 0.0006 | 0.0008 | 0.0005 | 0.0000 |
| 7.   | H     | 0.0005 | 0.0003 | 0.0000 | 0.0000 | 0.0001 | 0.0001 | 0.0000 | 0.0000 |
| 8.   | H     | 0.0006 | 0.0017 | 0.0006 | 0.0002 | 0.0003 | 0.0004 | 0.0005 | 0.0002 |
| 9.   | H     | 0.0033 | 0.0019 | 0.0001 | 0.0000 | 0.0003 | 0.0004 | 0.0000 | 0.0000 |
| 10.  | H     | 0.0000 | 0.0002 | 0.0001 | 0.0000 | 0.0002 | 0.0002 | 0.0000 | 0.0000 |
| 11.  | C     | 0.0002 | 0.0000 | 0.3863 | 0.0115 | 1.2939 | 0.1842 | 0.0169 | 0.0103 |
| 12.  | C     | 0.0001 | 0.3863 | 0.0000 | 2.4346 | 0.0345 | 0.0294 | 0.0012 | 0.0028 |
| 13.  | C     | 0.0000 | 0.0115 | 2.4346 | 0.0000 | 0.1063 | 0.2960 | 0.0013 | 0.0077 |
| 14.  | N     | 0.0002 | 1.2939 | 0.0345 | 0.1063 | 0.0000 | 1.1957 | 0.9385 | 0.0057 |
| 15.  | O     | 0.0002 | 0.1842 | 0.0294 | 0.2960 | 1.1957 | 0.0000 | 0.0469 | 0.0027 |
| 16.  | C     | 0.0000 | 0.0169 | 0.0012 | 0.0013 | 0.9385 | 0.0469 | 0.0000 | 0.9295 |
| 17.  | H     | 0.0000 | 0.0103 | 0.0028 | 0.0077 | 0.0057 | 0.0027 | 0.9295 | 0.0000 |
| 18.  | H     | 0.0000 | 0.0082 | 0.0005 | 0.0017 | 0.0029 | 0.0026 | 0.9364 | 0.0006 |
| 19.  | H     | 0.0000 | 0.0008 | 0.0001 | 0.0005 | 0.0026 | 0.0127 | 0.9378 | 0.0004 |



|     |   |        |        |        |        |        |        |        |        |        |
|-----|---|--------|--------|--------|--------|--------|--------|--------|--------|--------|
| 20. | H | 0.0000 | 0.9034 | 0.0018 | 0.0086 | 0.0031 | 0.0037 | 0.0128 | 0.0001 | 0.0002 |
| 21. | H | 0.0000 | 0.0009 | 0.9023 | 0.0129 | 0.0059 | 0.0201 | 0.0001 | 0.0004 | 0.0001 |
| 22. | C | 0.0000 | 0.0085 | 0.0229 | 1.0105 | 0.0017 | 0.0071 | 0.0002 | 0.0001 | 0.0000 |
| 23. | N | 0.0000 | 0.0009 | 0.0328 | 0.0126 | 0.0029 | 0.0075 | 0.0004 | 0.0001 | 0.0001 |
| 24. | O | 0.0000 | 0.0007 | 0.0616 | 0.0810 | 0.0064 | 0.0162 | 0.0003 | 0.0005 | 0.0002 |
| 25. | H | 0.0000 | 0.0003 | 0.0009 | 0.0005 | 0.0004 | 0.0118 | 0.0001 | 0.0000 | 0.0000 |
| 26. | H | 0.0000 | 0.0001 | 0.0009 | 0.0133 | 0.0004 | 0.0014 | 0.0000 | 0.0000 | 0.0000 |
| 27. | C | 0.0026 | 0.0006 | 0.0000 | 0.0000 | 0.0002 | 0.0001 | 0.0000 | 0.0000 | 0.0000 |
| 28. | H | 0.0004 | 0.0000 | 0.0000 | 0.0000 | 0.0000 | 0.0000 | 0.0000 | 0.0000 | 0.0000 |
| 29. | H | 0.0002 | 0.0001 | 0.0002 | 0.0000 | 0.0004 | 0.0004 | 0.0000 | 0.0000 | 0.0000 |
| 30. | H | 0.0001 | 0.0001 | 0.0002 | 0.0000 | 0.0004 | 0.0003 | 0.0000 | 0.0000 | 0.0000 |

| Atom | 19    | 20     | 21     | 22     | 23     | 24     | 25     | 26     | 27     |        |
|------|-------|--------|--------|--------|--------|--------|--------|--------|--------|--------|
| ---- | ----- | -----  | -----  | -----  | -----  | -----  | -----  | -----  | -----  |        |
| 1.   | C     | 0.0001 | 0.0009 | 0.0000 | 0.0002 | 0.0001 | 0.0000 | 0.0000 | 0.0000 | 1.0352 |
| 2.   | C     | 0.0002 | 0.0002 | 0.0000 | 0.0000 | 0.0000 | 0.0000 | 0.0000 | 0.0000 | 0.0110 |
| 3.   | C     | 0.0016 | 0.0085 | 0.0005 | 0.0003 | 0.0001 | 0.0001 | 0.0000 | 0.0000 | 0.0097 |
| 4.   | C     | 0.0006 | 0.0024 | 0.0003 | 0.0001 | 0.0001 | 0.0003 | 0.0001 | 0.0000 | 0.0015 |
| 5.   | C     | 0.0002 | 0.0021 | 0.0001 | 0.0004 | 0.0001 | 0.0000 | 0.0000 | 0.0000 | 0.0088 |
| 6.   | C     | 0.0001 | 0.0004 | 0.0000 | 0.0000 | 0.0000 | 0.0001 | 0.0000 | 0.0000 | 0.0109 |
| 7.   | H     | 0.0000 | 0.0003 | 0.0000 | 0.0000 | 0.0000 | 0.0000 | 0.0000 | 0.0000 | 0.0027 |
| 8.   | H     | 0.0000 | 0.0002 | 0.0000 | 0.0000 | 0.0000 | 0.0000 | 0.0000 | 0.0000 | 0.0004 |
| 9.   | H     | 0.0000 | 0.0003 | 0.0000 | 0.0000 | 0.0000 | 0.0000 | 0.0000 | 0.0000 | 0.0004 |
| 10.  | H     | 0.0000 | 0.0000 | 0.0000 | 0.0000 | 0.0000 | 0.0000 | 0.0000 | 0.0000 | 0.0026 |
| 11.  | C     | 0.0008 | 0.9034 | 0.0009 | 0.0085 | 0.0009 | 0.0007 | 0.0003 | 0.0001 | 0.0006 |
| 12.  | C     | 0.0001 | 0.0018 | 0.9023 | 0.0229 | 0.0328 | 0.0616 | 0.0009 | 0.0009 | 0.0000 |
| 13.  | C     | 0.0005 | 0.0086 | 0.0129 | 1.0105 | 0.0126 | 0.0810 | 0.0005 | 0.0133 | 0.0000 |
| 14.  | N     | 0.0026 | 0.0031 | 0.0059 | 0.0017 | 0.0029 | 0.0064 | 0.0004 | 0.0004 | 0.0002 |

|     |   |        |        |        |        |        |        |        |        |        |
|-----|---|--------|--------|--------|--------|--------|--------|--------|--------|--------|
| 15. | O | 0.0127 | 0.0037 | 0.0201 | 0.0071 | 0.0075 | 0.0162 | 0.0118 | 0.0014 | 0.0001 |
| 16. | C | 0.9378 | 0.0128 | 0.0001 | 0.0002 | 0.0004 | 0.0003 | 0.0001 | 0.0000 | 0.0000 |
| 17. | H | 0.0004 | 0.0001 | 0.0004 | 0.0001 | 0.0001 | 0.0005 | 0.0000 | 0.0000 | 0.0000 |
| 18. | H | 0.0007 | 0.0002 | 0.0001 | 0.0000 | 0.0001 | 0.0002 | 0.0000 | 0.0000 | 0.0000 |
| 19. | H | 0.0000 | 0.0003 | 0.0000 | 0.0000 | 0.0000 | 0.0001 | 0.0000 | 0.0000 | 0.0000 |
| 20. | H | 0.0003 | 0.0000 | 0.0003 | 0.0003 | 0.0002 | 0.0008 | 0.0000 | 0.0000 | 0.0000 |
| 21. | H | 0.0000 | 0.0003 | 0.0000 | 0.0018 | 0.0001 | 0.0012 | 0.0000 | 0.0001 | 0.0000 |
| 22. | C | 0.0000 | 0.0003 | 0.0018 | 0.0000 | 1.2231 | 1.6386 | 0.0033 | 0.0020 | 0.0000 |
| 23. | N | 0.0000 | 0.0002 | 0.0001 | 1.2231 | 0.0000 | 0.1932 | 0.7958 | 0.8273 | 0.0000 |
| 24. | O | 0.0001 | 0.0008 | 0.0012 | 1.6386 | 0.1932 | 0.0000 | 0.0119 | 0.0033 | 0.0000 |
| 25. | H | 0.0000 | 0.0000 | 0.0000 | 0.0033 | 0.7958 | 0.0119 | 0.0000 | 0.0003 | 0.0000 |
| 26. | H | 0.0000 | 0.0000 | 0.0001 | 0.0020 | 0.8273 | 0.0033 | 0.0003 | 0.0000 | 0.0000 |
| 27. | C | 0.0000 | 0.0000 | 0.0000 | 0.0000 | 0.0000 | 0.0000 | 0.0000 | 0.0000 | 0.0000 |
| 28. | H | 0.0000 | 0.0000 | 0.0000 | 0.0000 | 0.0000 | 0.0000 | 0.0000 | 0.0000 | 0.9441 |
| 29. | H | 0.0000 | 0.0000 | 0.0000 | 0.0000 | 0.0000 | 0.0000 | 0.0000 | 0.0000 | 0.9285 |
| 30. | H | 0.0000 | 0.0001 | 0.0000 | 0.0000 | 0.0000 | 0.0000 | 0.0000 | 0.0000 | 0.9266 |

| Atom | 28 | 29 | 30 |
|------|----|----|----|
|------|----|----|----|

-----

|    |   |        |        |        |
|----|---|--------|--------|--------|
| 1. | C | 0.0020 | 0.0025 | 0.0025 |
| 2. | C | 0.0074 | 0.0058 | 0.0067 |
| 3. | C | 0.0003 | 0.0002 | 0.0002 |
| 4. | C | 0.0001 | 0.0038 | 0.0044 |
| 5. | C | 0.0005 | 0.0002 | 0.0002 |
| 6. | C | 0.0019 | 0.0124 | 0.0126 |
| 7. | H | 0.0004 | 0.0001 | 0.0001 |
| 8. | H | 0.0003 | 0.0000 | 0.0000 |
| 9. | H | 0.0000 | 0.0001 | 0.0001 |

|     |   |        |        |        |
|-----|---|--------|--------|--------|
| 10. | H | 0.0004 | 0.0002 | 0.0001 |
| 11. | C | 0.0000 | 0.0001 | 0.0001 |
| 12. | C | 0.0000 | 0.0002 | 0.0002 |
| 13. | C | 0.0000 | 0.0000 | 0.0000 |
| 14. | N | 0.0000 | 0.0004 | 0.0004 |
| 15. | O | 0.0000 | 0.0004 | 0.0003 |
| 16. | C | 0.0000 | 0.0000 | 0.0000 |
| 17. | H | 0.0000 | 0.0000 | 0.0000 |
| 18. | H | 0.0000 | 0.0000 | 0.0000 |
| 19. | H | 0.0000 | 0.0000 | 0.0000 |
| 20. | H | 0.0000 | 0.0000 | 0.0001 |
| 21. | H | 0.0000 | 0.0000 | 0.0000 |
| 22. | C | 0.0000 | 0.0000 | 0.0000 |
| 23. | N | 0.0000 | 0.0000 | 0.0000 |
| 24. | O | 0.0000 | 0.0000 | 0.0000 |
| 25. | H | 0.0000 | 0.0000 | 0.0000 |
| 26. | H | 0.0000 | 0.0000 | 0.0000 |
| 27. | C | 0.9441 | 0.9285 | 0.9266 |
| 28. | H | 0.0000 | 0.0006 | 0.0006 |
| 29. | H | 0.0006 | 0.0000 | 0.0007 |
| 30. | H | 0.0006 | 0.0007 | 0.0000 |

**Wiberg bond index matrix in the NAO basis:**

**TS1-ex**

| Atom | 1 | 2 | 3 | 4 | 5 | 6 | 7 | 8 | 9 |
|------|---|---|---|---|---|---|---|---|---|
|------|---|---|---|---|---|---|---|---|---|

-----

|    |   |        |        |        |        |        |        |        |        |        |
|----|---|--------|--------|--------|--------|--------|--------|--------|--------|--------|
| 1. | C | 0.0000 | 1.3744 | 0.0136 | 0.0920 | 0.0133 | 1.4045 | 0.0035 | 0.0081 | 0.0084 |
| 2. | C | 1.3744 | 0.0000 | 1.4768 | 0.0121 | 0.1020 | 0.0120 | 0.9258 | 0.0039 | 0.0006 |

|     |   |        |        |        |        |        |        |        |        |        |
|-----|---|--------|--------|--------|--------|--------|--------|--------|--------|--------|
| 3.  | C | 0.0136 | 1.4768 | 0.0000 | 1.3341 | 0.0130 | 0.1015 | 0.0037 | 0.9106 | 0.0104 |
| 4.  | C | 0.0920 | 0.0121 | 1.3341 | 0.0000 | 1.3670 | 0.0130 | 0.0089 | 0.0032 | 0.0033 |
| 5.  | C | 0.0133 | 0.1020 | 0.0130 | 1.3670 | 0.0000 | 1.4415 | 0.0006 | 0.0095 | 0.9264 |
| 6.  | C | 1.4045 | 0.0120 | 0.1015 | 0.0130 | 1.4415 | 0.0000 | 0.0104 | 0.0005 | 0.0039 |
| 7.  | H | 0.0035 | 0.9258 | 0.0037 | 0.0089 | 0.0006 | 0.0104 | 0.0000 | 0.0034 | 0.0006 |
| 8.  | H | 0.0081 | 0.0039 | 0.9106 | 0.0032 | 0.0095 | 0.0005 | 0.0034 | 0.0000 | 0.0005 |
| 9.  | H | 0.0084 | 0.0006 | 0.0104 | 0.0033 | 0.9264 | 0.0039 | 0.0006 | 0.0005 | 0.0000 |
| 10. | H | 0.0038 | 0.0106 | 0.0006 | 0.0088 | 0.0035 | 0.9257 | 0.0005 | 0.0005 | 0.0034 |
| 11. | C | 0.0022 | 0.0112 | 0.0114 | 1.1069 | 0.0130 | 0.0096 | 0.0002 | 0.0015 | 0.0019 |
| 12. | C | 0.0106 | 0.0008 | 0.0153 | 0.0053 | 0.0157 | 0.0002 | 0.0000 | 0.0002 | 0.0001 |
| 13. | C | 0.0012 | 0.0003 | 0.0009 | 0.0027 | 0.0028 | 0.0002 | 0.0000 | 0.0002 | 0.0000 |
| 14. | N | 0.0115 | 0.0007 | 0.0141 | 0.0141 | 0.0237 | 0.0007 | 0.0000 | 0.0002 | 0.0004 |
| 15. | O | 0.0097 | 0.0016 | 0.0166 | 0.0036 | 0.0124 | 0.0004 | 0.0002 | 0.0043 | 0.0000 |
| 16. | C | 0.0005 | 0.0001 | 0.0011 | 0.0013 | 0.0008 | 0.0001 | 0.0000 | 0.0000 | 0.0001 |
| 17. | O | 0.0012 | 0.0001 | 0.0017 | 0.0008 | 0.0016 | 0.0001 | 0.0000 | 0.0000 | 0.0001 |
| 18. | N | 0.0008 | 0.0002 | 0.0007 | 0.0009 | 0.0031 | 0.0008 | 0.0000 | 0.0000 | 0.0002 |
| 19. | C | 0.0003 | 0.0003 | 0.0008 | 0.0113 | 0.0008 | 0.0003 | 0.0000 | 0.0001 | 0.0001 |
| 20. | H | 0.0000 | 0.0001 | 0.0000 | 0.0001 | 0.0000 | 0.0000 | 0.0000 | 0.0000 | 0.0000 |
| 21. | H | 0.0000 | 0.0000 | 0.0000 | 0.0000 | 0.0000 | 0.0000 | 0.0000 | 0.0000 | 0.0000 |
| 22. | H | 0.0005 | 0.0001 | 0.0086 | 0.0026 | 0.0019 | 0.0004 | 0.0004 | 0.0002 | 0.0004 |
| 23. | H | 0.0002 | 0.0000 | 0.0002 | 0.0004 | 0.0004 | 0.0000 | 0.0000 | 0.0000 | 0.0000 |
| 24. | H | 0.0000 | 0.0000 | 0.0001 | 0.0004 | 0.0001 | 0.0000 | 0.0000 | 0.0000 | 0.0000 |
| 25. | H | 0.0007 | 0.0000 | 0.0008 | 0.0002 | 0.0010 | 0.0000 | 0.0000 | 0.0000 | 0.0000 |
| 26. | H | 0.0009 | 0.0000 | 0.0011 | 0.0001 | 0.0012 | 0.0000 | 0.0000 | 0.0000 | 0.0000 |
| 27. | C | 1.0355 | 0.0109 | 0.0098 | 0.0013 | 0.0088 | 0.0106 | 0.0026 | 0.0004 | 0.0004 |
| 28. | H | 0.0025 | 0.0061 | 0.0002 | 0.0039 | 0.0002 | 0.0126 | 0.0001 | 0.0000 | 0.0001 |
| 29. | H | 0.0025 | 0.0060 | 0.0002 | 0.0038 | 0.0002 | 0.0124 | 0.0001 | 0.0000 | 0.0001 |
| 30. | H | 0.0020 | 0.0075 | 0.0003 | 0.0000 | 0.0005 | 0.0019 | 0.0004 | 0.0003 | 0.0001 |

| Atom  | 10     | 11     | 12     | 13     | 14     | 15     | 16     | 17     | 18     |
|-------|--------|--------|--------|--------|--------|--------|--------|--------|--------|
| ----- |        |        |        |        |        |        |        |        |        |
| 1. C  | 0.0038 | 0.0022 | 0.0106 | 0.0012 | 0.0115 | 0.0097 | 0.0005 | 0.0012 | 0.0008 |
| 2. C  | 0.0106 | 0.0112 | 0.0008 | 0.0003 | 0.0007 | 0.0016 | 0.0001 | 0.0001 | 0.0002 |
| 3. C  | 0.0006 | 0.0114 | 0.0153 | 0.0009 | 0.0141 | 0.0166 | 0.0011 | 0.0017 | 0.0007 |
| 4. C  | 0.0088 | 1.1069 | 0.0053 | 0.0027 | 0.0141 | 0.0036 | 0.0013 | 0.0008 | 0.0009 |
| 5. C  | 0.0035 | 0.0130 | 0.0157 | 0.0028 | 0.0237 | 0.0124 | 0.0008 | 0.0016 | 0.0031 |
| 6. C  | 0.9257 | 0.0096 | 0.0002 | 0.0002 | 0.0007 | 0.0004 | 0.0001 | 0.0001 | 0.0008 |
| 7. H  | 0.0005 | 0.0002 | 0.0000 | 0.0000 | 0.0000 | 0.0002 | 0.0000 | 0.0000 | 0.0000 |
| 8. H  | 0.0005 | 0.0015 | 0.0002 | 0.0002 | 0.0002 | 0.0043 | 0.0000 | 0.0000 | 0.0000 |
| 9. H  | 0.0034 | 0.0019 | 0.0001 | 0.0000 | 0.0004 | 0.0000 | 0.0001 | 0.0001 | 0.0002 |
| 10. H | 0.0000 | 0.0002 | 0.0000 | 0.0000 | 0.0002 | 0.0000 | 0.0000 | 0.0000 | 0.0001 |
| 11. C | 0.0002 | 0.0000 | 0.2698 | 0.0039 | 1.3331 | 0.1644 | 0.0064 | 0.0114 | 0.0110 |
| 12. C | 0.0000 | 0.2698 | 0.0000 | 2.3877 | 0.0462 | 0.0457 | 1.0588 | 0.0829 | 0.0172 |
| 13. C | 0.0000 | 0.0039 | 2.3877 | 0.0000 | 0.0618 | 0.4287 | 0.0283 | 0.0560 | 0.0230 |
| 14. N | 0.0002 | 1.3331 | 0.0462 | 0.0618 | 0.0000 | 1.1485 | 0.0056 | 0.0058 | 0.0043 |
| 15. O | 0.0000 | 0.1644 | 0.0457 | 0.4287 | 1.1485 | 0.0000 | 0.0153 | 0.0075 | 0.0032 |
| 16. C | 0.0000 | 0.0064 | 1.0588 | 0.0283 | 0.0056 | 0.0153 | 0.0000 | 1.6225 | 1.1713 |
| 17. O | 0.0000 | 0.0114 | 0.0829 | 0.0560 | 0.0058 | 0.0075 | 1.6225 | 0.0000 | 0.1697 |
| 18. N | 0.0001 | 0.0110 | 0.0172 | 0.0230 | 0.0043 | 0.0032 | 1.1713 | 0.1697 | 0.0000 |
| 19. C | 0.0001 | 0.0143 | 0.0022 | 0.0014 | 0.9377 | 0.0428 | 0.0003 | 0.0005 | 0.0001 |
| 20. H | 0.0000 | 0.0001 | 0.0008 | 0.0007 | 0.0000 | 0.0001 | 0.0030 | 0.0143 | 0.8285 |
| 21. H | 0.0000 | 0.0001 | 0.0119 | 0.0026 | 0.0001 | 0.0007 | 0.0021 | 0.0036 | 0.8260 |
| 22. H | 0.0000 | 0.9199 | 0.0007 | 0.0005 | 0.0037 | 0.0140 | 0.0001 | 0.0003 | 0.0001 |
| 23. H | 0.0000 | 0.0088 | 0.0007 | 0.0010 | 0.0027 | 0.0019 | 0.0001 | 0.0002 | 0.0001 |
| 24. H | 0.0000 | 0.0004 | 0.0002 | 0.0003 | 0.0029 | 0.0127 | 0.0000 | 0.0001 | 0.0000 |
| 25. H | 0.0000 | 0.0102 | 0.0031 | 0.0044 | 0.0054 | 0.0024 | 0.0003 | 0.0003 | 0.0002 |

|     |   |        |        |        |        |        |        |        |        |        |
|-----|---|--------|--------|--------|--------|--------|--------|--------|--------|--------|
| 26. | H | 0.0000 | 0.0151 | 0.0115 | 0.9108 | 0.0020 | 0.0089 | 0.0027 | 0.0010 | 0.0003 |
| 27. | C | 0.0025 | 0.0007 | 0.0001 | 0.0000 | 0.0002 | 0.0002 | 0.0000 | 0.0000 | 0.0000 |
| 28. | H | 0.0001 | 0.0001 | 0.0005 | 0.0001 | 0.0006 | 0.0005 | 0.0000 | 0.0001 | 0.0000 |
| 29. | H | 0.0002 | 0.0001 | 0.0005 | 0.0001 | 0.0006 | 0.0005 | 0.0000 | 0.0001 | 0.0001 |
| 30. | H | 0.0005 | 0.0000 | 0.0000 | 0.0000 | 0.0000 | 0.0000 | 0.0000 | 0.0000 | 0.0000 |

| Atom  | 19 | 20     | 21     | 22     | 23     | 24     | 25     | 26     | 27     |        |
|-------|----|--------|--------|--------|--------|--------|--------|--------|--------|--------|
| ----- |    |        |        |        |        |        |        |        |        |        |
| 1.    | C  | 0.0003 | 0.0000 | 0.0000 | 0.0005 | 0.0002 | 0.0000 | 0.0007 | 0.0009 | 1.0355 |
| 2.    | C  | 0.0003 | 0.0001 | 0.0000 | 0.0001 | 0.0000 | 0.0000 | 0.0000 | 0.0000 | 0.0109 |
| 3.    | C  | 0.0008 | 0.0000 | 0.0000 | 0.0086 | 0.0002 | 0.0001 | 0.0008 | 0.0011 | 0.0098 |
| 4.    | C  | 0.0113 | 0.0001 | 0.0000 | 0.0026 | 0.0004 | 0.0004 | 0.0002 | 0.0001 | 0.0013 |
| 5.    | C  | 0.0008 | 0.0000 | 0.0000 | 0.0019 | 0.0004 | 0.0001 | 0.0010 | 0.0012 | 0.0088 |
| 6.    | C  | 0.0003 | 0.0000 | 0.0000 | 0.0004 | 0.0000 | 0.0000 | 0.0000 | 0.0000 | 0.0106 |
| 7.    | H  | 0.0000 | 0.0000 | 0.0000 | 0.0004 | 0.0000 | 0.0000 | 0.0000 | 0.0000 | 0.0026 |
| 8.    | H  | 0.0001 | 0.0000 | 0.0000 | 0.0002 | 0.0000 | 0.0000 | 0.0000 | 0.0000 | 0.0004 |
| 9.    | H  | 0.0001 | 0.0000 | 0.0000 | 0.0004 | 0.0000 | 0.0000 | 0.0000 | 0.0000 | 0.0004 |
| 10.   | H  | 0.0001 | 0.0000 | 0.0000 | 0.0000 | 0.0000 | 0.0000 | 0.0000 | 0.0000 | 0.0025 |
| 11.   | C  | 0.0143 | 0.0001 | 0.0001 | 0.9199 | 0.0088 | 0.0004 | 0.0102 | 0.0151 | 0.0007 |
| 12.   | C  | 0.0022 | 0.0008 | 0.0119 | 0.0007 | 0.0007 | 0.0002 | 0.0031 | 0.0115 | 0.0001 |
| 13.   | C  | 0.0014 | 0.0007 | 0.0026 | 0.0005 | 0.0010 | 0.0003 | 0.0044 | 0.9108 | 0.0000 |
| 14.   | N  | 0.9377 | 0.0000 | 0.0001 | 0.0037 | 0.0027 | 0.0029 | 0.0054 | 0.0020 | 0.0002 |
| 15.   | O  | 0.0428 | 0.0001 | 0.0007 | 0.0140 | 0.0019 | 0.0127 | 0.0024 | 0.0089 | 0.0002 |
| 16.   | C  | 0.0003 | 0.0030 | 0.0021 | 0.0001 | 0.0001 | 0.0000 | 0.0003 | 0.0027 | 0.0000 |
| 17.   | O  | 0.0005 | 0.0143 | 0.0036 | 0.0003 | 0.0002 | 0.0001 | 0.0003 | 0.0010 | 0.0000 |
| 18.   | N  | 0.0001 | 0.8285 | 0.8260 | 0.0001 | 0.0001 | 0.0000 | 0.0002 | 0.0003 | 0.0000 |
| 19.   | C  | 0.0000 | 0.0000 | 0.0000 | 0.0012 | 0.9380 | 0.9443 | 0.9266 | 0.0001 | 0.0000 |
| 20.   | H  | 0.0000 | 0.0000 | 0.0002 | 0.0000 | 0.0000 | 0.0000 | 0.0000 | 0.0000 | 0.0000 |

|     |   |        |        |        |        |        |        |        |        |
|-----|---|--------|--------|--------|--------|--------|--------|--------|--------|
| 21. | H | 0.0000 | 0.0002 | 0.0000 | 0.0000 | 0.0000 | 0.0000 | 0.0000 | 0.0000 |
| 22. | H | 0.0012 | 0.0000 | 0.0000 | 0.0000 | 0.0005 | 0.0001 | 0.0001 | 0.0000 |
| 23. | H | 0.9380 | 0.0000 | 0.0000 | 0.0005 | 0.0000 | 0.0007 | 0.0005 | 0.0000 |
| 24. | H | 0.9443 | 0.0000 | 0.0000 | 0.0001 | 0.0007 | 0.0000 | 0.0005 | 0.0000 |
| 25. | H | 0.9266 | 0.0000 | 0.0000 | 0.0001 | 0.0005 | 0.0005 | 0.0000 | 0.0001 |
| 26. | H | 0.0001 | 0.0000 | 0.0000 | 0.0000 | 0.0000 | 0.0000 | 0.0001 | 0.0000 |
| 27. | C | 0.0000 | 0.0000 | 0.0000 | 0.0000 | 0.0000 | 0.0000 | 0.0000 | 0.0000 |
| 28. | H | 0.0000 | 0.0000 | 0.0000 | 0.0000 | 0.0000 | 0.0000 | 0.0000 | 0.9276 |
| 29. | H | 0.0000 | 0.0000 | 0.0000 | 0.0000 | 0.0000 | 0.0000 | 0.0000 | 0.9286 |
| 30. | H | 0.0000 | 0.0000 | 0.0000 | 0.0000 | 0.0000 | 0.0000 | 0.0000 | 0.9450 |

| Atom | 28 | 29 | 30 |
|------|----|----|----|
|------|----|----|----|

-----

|     |   |        |        |        |
|-----|---|--------|--------|--------|
| 1.  | C | 0.0025 | 0.0025 | 0.0020 |
| 2.  | C | 0.0061 | 0.0060 | 0.0075 |
| 3.  | C | 0.0002 | 0.0002 | 0.0003 |
| 4.  | C | 0.0039 | 0.0038 | 0.0000 |
| 5.  | C | 0.0002 | 0.0002 | 0.0005 |
| 6.  | C | 0.0126 | 0.0124 | 0.0019 |
| 7.  | H | 0.0001 | 0.0001 | 0.0004 |
| 8.  | H | 0.0000 | 0.0000 | 0.0003 |
| 9.  | H | 0.0001 | 0.0001 | 0.0001 |
| 10. | H | 0.0001 | 0.0002 | 0.0005 |
| 11. | C | 0.0001 | 0.0001 | 0.0000 |
| 12. | C | 0.0005 | 0.0005 | 0.0000 |
| 13. | C | 0.0001 | 0.0001 | 0.0000 |
| 14. | N | 0.0006 | 0.0006 | 0.0000 |
| 15. | O | 0.0005 | 0.0005 | 0.0000 |

|     |   |        |        |        |
|-----|---|--------|--------|--------|
| 16. | C | 0.0000 | 0.0000 | 0.0000 |
| 17. | O | 0.0001 | 0.0001 | 0.0000 |
| 18. | N | 0.0000 | 0.0001 | 0.0000 |
| 19. | C | 0.0000 | 0.0000 | 0.0000 |
| 20. | H | 0.0000 | 0.0000 | 0.0000 |
| 21. | H | 0.0000 | 0.0000 | 0.0000 |
| 22. | H | 0.0000 | 0.0000 | 0.0000 |
| 23. | H | 0.0000 | 0.0000 | 0.0000 |
| 24. | H | 0.0000 | 0.0000 | 0.0000 |
| 25. | H | 0.0000 | 0.0000 | 0.0000 |
| 26. | H | 0.0000 | 0.0000 | 0.0000 |
| 27. | C | 0.9276 | 0.9286 | 0.9450 |
| 28. | H | 0.0000 | 0.0007 | 0.0006 |
| 29. | H | 0.0007 | 0.0000 | 0.0006 |
| 30. | H | 0.0006 | 0.0006 | 0.0000 |

### Wiberg bond index matrix in the NAO basis:

#### TS2-en

Wiberg bond index matrix in the NAO basis:

| Atom | 1      | 2      | 3      | 4      | 5      | 6      | 7      | 8      | 9      |
|------|--------|--------|--------|--------|--------|--------|--------|--------|--------|
| 1. C | 0.0000 | 1.4054 | 0.0131 | 0.0941 | 0.0138 | 1.3776 | 0.0038 | 0.0085 | 0.0080 |
| 2. C | 1.4054 | 0.0000 | 1.4389 | 0.0138 | 0.1026 | 0.0121 | 0.9261 | 0.0041 | 0.0005 |
| 3. C | 0.0131 | 1.4389 | 0.0000 | 1.3757 | 0.0132 | 0.1040 | 0.0034 | 0.9288 | 0.0094 |
| 4. C | 0.0941 | 0.0138 | 1.3757 | 0.0000 | 1.3423 | 0.0123 | 0.0086 | 0.0034 | 0.0033 |
| 5. C | 0.0138 | 0.1026 | 0.0132 | 1.3423 | 0.0000 | 1.4723 | 0.0006 | 0.0106 | 0.9094 |
| 6. C | 1.3776 | 0.0121 | 0.1040 | 0.0123 | 1.4723 | 0.0000 | 0.0106 | 0.0006 | 0.0039 |



|     |   |        |        |        |        |        |        |        |        |        |
|-----|---|--------|--------|--------|--------|--------|--------|--------|--------|--------|
| 7.  | H | 0.0038 | 0.9261 | 0.0034 | 0.0086 | 0.0006 | 0.0106 | 0.0000 | 0.0033 | 0.0005 |
| 8.  | H | 0.0085 | 0.0041 | 0.9288 | 0.0034 | 0.0106 | 0.0006 | 0.0033 | 0.0000 | 0.0005 |
| 9.  | H | 0.0080 | 0.0005 | 0.0094 | 0.0033 | 0.9094 | 0.0039 | 0.0005 | 0.0005 | 0.0000 |
| 10. | H | 0.0034 | 0.0104 | 0.0006 | 0.0089 | 0.0037 | 0.9256 | 0.0005 | 0.0006 | 0.0034 |
| 11. | C | 0.0019 | 0.0093 | 0.0126 | 1.0814 | 0.0114 | 0.0102 | 0.0003 | 0.0019 | 0.0015 |
| 12. | C | 0.0073 | 0.0002 | 0.0129 | 0.0081 | 0.0117 | 0.0010 | 0.0001 | 0.0002 | 0.0001 |
| 13. | C | 0.0024 | 0.0005 | 0.0048 | 0.0080 | 0.0021 | 0.0005 | 0.0001 | 0.0001 | 0.0003 |
| 14. | N | 0.0104 | 0.0007 | 0.0215 | 0.0126 | 0.0129 | 0.0005 | 0.0002 | 0.0003 | 0.0002 |
| 15. | O | 0.0098 | 0.0004 | 0.0122 | 0.0039 | 0.0177 | 0.0017 | 0.0000 | 0.0001 | 0.0039 |
| 16. | C | 0.0004 | 0.0003 | 0.0008 | 0.0109 | 0.0009 | 0.0003 | 0.0001 | 0.0001 | 0.0001 |
| 17. | H | 0.0001 | 0.0000 | 0.0003 | 0.0004 | 0.0002 | 0.0000 | 0.0000 | 0.0000 | 0.0000 |
| 18. | H | 0.0000 | 0.0000 | 0.0001 | 0.0004 | 0.0001 | 0.0000 | 0.0000 | 0.0000 | 0.0000 |
| 19. | H | 0.0007 | 0.0000 | 0.0009 | 0.0002 | 0.0008 | 0.0000 | 0.0000 | 0.0000 | 0.0000 |
| 20. | H | 0.0000 | 0.0001 | 0.0002 | 0.0004 | 0.0001 | 0.0000 | 0.0000 | 0.0000 | 0.0000 |
| 21. | C | 0.0004 | 0.0001 | 0.0005 | 0.0006 | 0.0006 | 0.0001 | 0.0000 | 0.0000 | 0.0000 |
| 22. | N | 0.0002 | 0.0000 | 0.0003 | 0.0002 | 0.0003 | 0.0000 | 0.0000 | 0.0000 | 0.0001 |
| 23. | O | 0.0003 | 0.0001 | 0.0004 | 0.0007 | 0.0003 | 0.0001 | 0.0000 | 0.0000 | 0.0000 |
| 24. | H | 0.0000 | 0.0000 | 0.0000 | 0.0000 | 0.0000 | 0.0000 | 0.0000 | 0.0000 | 0.0000 |
| 25. | H | 0.0000 | 0.0000 | 0.0000 | 0.0000 | 0.0000 | 0.0000 | 0.0000 | 0.0000 | 0.0000 |
| 26. | H | 0.0004 | 0.0005 | 0.0019 | 0.0026 | 0.0084 | 0.0001 | 0.0001 | 0.0005 | 0.0002 |
| 27. | C | 1.0352 | 0.0106 | 0.0088 | 0.0013 | 0.0098 | 0.0109 | 0.0025 | 0.0005 | 0.0004 |
| 28. | H | 0.0025 | 0.0125 | 0.0002 | 0.0040 | 0.0002 | 0.0062 | 0.0002 | 0.0001 | 0.0000 |
| 29. | H | 0.0020 | 0.0019 | 0.0005 | 0.0000 | 0.0003 | 0.0075 | 0.0005 | 0.0001 | 0.0003 |
| 30. | H | 0.0025 | 0.0125 | 0.0002 | 0.0039 | 0.0002 | 0.0060 | 0.0001 | 0.0001 | 0.0000 |

| Atom | 10 | 11 | 12 | 13 | 14 | 15 | 16 | 17 | 18 |
|------|----|----|----|----|----|----|----|----|----|
|------|----|----|----|----|----|----|----|----|----|

-----

|    |   |        |        |        |        |        |        |        |        |        |
|----|---|--------|--------|--------|--------|--------|--------|--------|--------|--------|
| 1. | C | 0.0034 | 0.0019 | 0.0073 | 0.0024 | 0.0104 | 0.0098 | 0.0004 | 0.0001 | 0.0000 |
|----|---|--------|--------|--------|--------|--------|--------|--------|--------|--------|

[illegible]

30. H 0.0001 0.0001 0.0003 0.0001 0.0005 0.0005 0.0000 0.0000 0.0000

Atom 19 20 21 22 23 24 25 26 27

-----

1. C 0.0007 0.0000 0.0004 0.0002 0.0003 0.0000 0.0000 0.0004 1.0352  
2. C 0.0000 0.0001 0.0001 0.0000 0.0001 0.0000 0.0000 0.0005 0.0106  
3. C 0.0009 0.0002 0.0005 0.0003 0.0004 0.0000 0.0000 0.0019 0.0088  
4. C 0.0002 0.0004 0.0006 0.0002 0.0007 0.0000 0.0000 0.0026 0.0013  
5. C 0.0008 0.0001 0.0006 0.0003 0.0003 0.0000 0.0000 0.0084 0.0098  
6. C 0.0000 0.0000 0.0001 0.0000 0.0001 0.0000 0.0000 0.0001 0.0109  
7. H 0.0000 0.0000 0.0000 0.0000 0.0000 0.0000 0.0000 0.0001 0.0025  
8. H 0.0000 0.0000 0.0000 0.0000 0.0000 0.0000 0.0000 0.0005 0.0005  
9. H 0.0000 0.0000 0.0000 0.0001 0.0000 0.0000 0.0000 0.0002 0.0004  
10. H 0.0000 0.0000 0.0000 0.0000 0.0000 0.0000 0.0000 0.0004 0.0026  
11. C 0.0093 0.0008 0.0085 0.0007 0.0005 0.0003 0.0001 0.9224 0.0006  
12. C 0.0024 0.9033 0.0228 0.0326 0.0616 0.0009 0.0009 0.0005 0.0001  
13. C 0.0075 0.0130 1.0120 0.0129 0.0819 0.0005 0.0132 0.0009 0.0001  
14. N 0.0061 0.0054 0.0017 0.0023 0.0061 0.0004 0.0004 0.0035 0.0002  
15. O 0.0022 0.0197 0.0072 0.0089 0.0171 0.0109 0.0013 0.0148 0.0002  
16. C 0.9280 0.0001 0.0003 0.0003 0.0002 0.0001 0.0000 0.0011 0.0000  
17. H 0.0005 0.0001 0.0000 0.0001 0.0002 0.0000 0.0000 0.0005 0.0000  
18. H 0.0004 0.0000 0.0000 0.0000 0.0000 0.0000 0.0000 0.0001 0.0000  
19. H 0.0000 0.0004 0.0001 0.0001 0.0004 0.0000 0.0000 0.0001 0.0000  
20. H 0.0004 0.0000 0.0018 0.0001 0.0013 0.0000 0.0001 0.0000 0.0000  
21. C 0.0001 0.0018 0.0000 1.2195 1.6406 0.0032 0.0019 0.0000 0.0000  
22. N 0.0001 0.0001 1.2195 0.0000 0.1917 0.7972 0.8270 0.0001 0.0000  
23. O 0.0004 0.0013 1.6406 0.1917 0.0000 0.0119 0.0033 0.0001 0.0000  
24. H 0.0000 0.0000 0.0032 0.7972 0.0119 0.0000 0.0002 0.0000 0.0000

|     |   |        |        |        |        |        |        |        |        |        |
|-----|---|--------|--------|--------|--------|--------|--------|--------|--------|--------|
| 25. | H | 0.0000 | 0.0001 | 0.0019 | 0.8270 | 0.0033 | 0.0002 | 0.0000 | 0.0000 | 0.0000 |
| 26. | H | 0.0001 | 0.0000 | 0.0000 | 0.0001 | 0.0001 | 0.0000 | 0.0000 | 0.0000 | 0.0000 |
| 27. | C | 0.0000 | 0.0000 | 0.0000 | 0.0000 | 0.0000 | 0.0000 | 0.0000 | 0.0000 | 0.0000 |
| 28. | H | 0.0000 | 0.0000 | 0.0000 | 0.0000 | 0.0000 | 0.0000 | 0.0000 | 0.0000 | 0.9274 |
| 29. | H | 0.0000 | 0.0000 | 0.0000 | 0.0000 | 0.0000 | 0.0000 | 0.0000 | 0.0000 | 0.9453 |
| 30. | H | 0.0000 | 0.0000 | 0.0000 | 0.0000 | 0.0000 | 0.0000 | 0.0000 | 0.0000 | 0.9285 |

| Atom | 28 | 29 | 30 |
|------|----|----|----|
|------|----|----|----|

|       |       |       |
|-------|-------|-------|
| ----- | ----- | ----- |
|-------|-------|-------|

|     |   |        |        |        |
|-----|---|--------|--------|--------|
| 1.  | C | 0.0025 | 0.0020 | 0.0025 |
| 2.  | C | 0.0125 | 0.0019 | 0.0125 |
| 3.  | C | 0.0002 | 0.0005 | 0.0002 |
| 4.  | C | 0.0040 | 0.0000 | 0.0039 |
| 5.  | C | 0.0002 | 0.0003 | 0.0002 |
| 6.  | C | 0.0062 | 0.0075 | 0.0060 |
| 7.  | H | 0.0002 | 0.0005 | 0.0001 |
| 8.  | H | 0.0001 | 0.0001 | 0.0001 |
| 9.  | H | 0.0000 | 0.0003 | 0.0000 |
| 10. | H | 0.0001 | 0.0004 | 0.0001 |
| 11. | C | 0.0001 | 0.0000 | 0.0001 |
| 12. | C | 0.0004 | 0.0000 | 0.0003 |
| 13. | C | 0.0001 | 0.0000 | 0.0001 |
| 14. | N | 0.0005 | 0.0000 | 0.0005 |
| 15. | O | 0.0005 | 0.0000 | 0.0005 |
| 16. | C | 0.0000 | 0.0000 | 0.0000 |
| 17. | H | 0.0000 | 0.0000 | 0.0000 |
| 18. | H | 0.0000 | 0.0000 | 0.0000 |
| 19. | H | 0.0000 | 0.0000 | 0.0000 |

20. H 0.0000 0.0000 0.0000  
 21. C 0.0000 0.0000 0.0000  
 22. N 0.0000 0.0000 0.0000  
 23. O 0.0000 0.0000 0.0000  
 24. H 0.0000 0.0000 0.0000  
 25. H 0.0000 0.0000 0.0000  
 26. H 0.0000 0.0000 0.0000  
 27. C 0.9274 0.9453 0.9285  
 28. H 0.0000 0.0006 0.0007  
 29. H 0.0006 0.0000 0.0006  
 30. H 0.0007 0.0006 0.0000

**Wiberg bond index matrix in the NAO basis:**

**TS2-ex**

| Atom  | 1      | 2      | 3      | 4      | 5      | 6      | 7      | 8      | 9      |
|-------|--------|--------|--------|--------|--------|--------|--------|--------|--------|
| ----- |        |        |        |        |        |        |        |        |        |
| 1. C  | 0.0000 | 1.3917 | 0.0134 | 0.0964 | 0.0140 | 1.3931 | 0.0037 | 0.0084 | 0.0081 |
| 2. C  | 1.3917 | 0.0000 | 1.4549 | 0.0140 | 0.1028 | 0.0120 | 0.9254 | 0.0036 | 0.0006 |
| 3. C  | 0.0134 | 1.4549 | 0.0000 | 1.3647 | 0.0145 | 0.1055 | 0.0035 | 0.9260 | 0.0098 |
| 4. C  | 0.0964 | 0.0140 | 1.3647 | 0.0000 | 1.3623 | 0.0124 | 0.0087 | 0.0033 | 0.0031 |
| 5. C  | 0.0140 | 0.1028 | 0.0145 | 1.3623 | 0.0000 | 1.4515 | 0.0005 | 0.0101 | 0.9162 |
| 6. C  | 1.3931 | 0.0120 | 0.1055 | 0.0124 | 1.4515 | 0.0000 | 0.0104 | 0.0006 | 0.0039 |
| 7. H  | 0.0037 | 0.9254 | 0.0035 | 0.0087 | 0.0005 | 0.0104 | 0.0000 | 0.0034 | 0.0005 |
| 8. H  | 0.0084 | 0.0036 | 0.9260 | 0.0033 | 0.0101 | 0.0006 | 0.0034 | 0.0000 | 0.0005 |
| 9. H  | 0.0081 | 0.0006 | 0.0098 | 0.0031 | 0.9162 | 0.0039 | 0.0005 | 0.0005 | 0.0000 |
| 10. H | 0.0036 | 0.0106 | 0.0006 | 0.0090 | 0.0039 | 0.9245 | 0.0005 | 0.0006 | 0.0034 |
| 11. C | 0.0027 | 0.0097 | 0.0146 | 1.0776 | 0.0128 | 0.0096 | 0.0003 | 0.0018 | 0.0016 |
| 12. C | 0.0055 | 0.0004 | 0.0111 | 0.0025 | 0.0075 | 0.0004 | 0.0001 | 0.0001 | 0.0003 |
| 13. C | 0.0001 | 0.0002 | 0.0002 | 0.0013 | 0.0004 | 0.0001 | 0.0000 | 0.0000 | 0.0000 |

|     |   |        |        |        |        |        |        |        |        |        |
|-----|---|--------|--------|--------|--------|--------|--------|--------|--------|--------|
| 14. | N | 0.0095 | 0.0008 | 0.0190 | 0.0133 | 0.0167 | 0.0009 | 0.0003 | 0.0003 | 0.0002 |
| 15. | O | 0.0061 | 0.0007 | 0.0098 | 0.0138 | 0.0091 | 0.0005 | 0.0002 | 0.0003 | 0.0003 |
| 16. | C | 0.0002 | 0.0002 | 0.0005 | 0.0010 | 0.0009 | 0.0003 | 0.0000 | 0.0000 | 0.0001 |
| 17. | O | 0.0006 | 0.0004 | 0.0006 | 0.0014 | 0.0052 | 0.0010 | 0.0000 | 0.0001 | 0.0018 |
| 18. | N | 0.0002 | 0.0002 | 0.0006 | 0.0017 | 0.0006 | 0.0002 | 0.0000 | 0.0001 | 0.0004 |
| 19. | C | 0.0005 | 0.0005 | 0.0011 | 0.0014 | 0.0019 | 0.0009 | 0.0000 | 0.0000 | 0.0004 |
| 20. | H | 0.0000 | 0.0000 | 0.0000 | 0.0000 | 0.0000 | 0.0000 | 0.0000 | 0.0000 | 0.0000 |
| 21. | H | 0.0000 | 0.0000 | 0.0000 | 0.0000 | 0.0000 | 0.0000 | 0.0000 | 0.0000 | 0.0000 |
| 22. | H | 0.0003 | 0.0002 | 0.0004 | 0.0005 | 0.0006 | 0.0001 | 0.0000 | 0.0000 | 0.0001 |
| 23. | H | 0.0001 | 0.0001 | 0.0002 | 0.0007 | 0.0016 | 0.0002 | 0.0000 | 0.0000 | 0.0000 |
| 24. | H | 0.0004 | 0.0000 | 0.0005 | 0.0004 | 0.0007 | 0.0000 | 0.0000 | 0.0000 | 0.0001 |
| 25. | H | 0.0006 | 0.0000 | 0.0010 | 0.0000 | 0.0008 | 0.0000 | 0.0000 | 0.0000 | 0.0000 |
| 26. | C | 1.0355 | 0.0107 | 0.0092 | 0.0016 | 0.0093 | 0.0108 | 0.0026 | 0.0004 | 0.0004 |
| 27. | H | 0.0027 | 0.0112 | 0.0001 | 0.0055 | 0.0001 | 0.0108 | 0.0001 | 0.0000 | 0.0000 |
| 28. | H | 0.0021 | 0.0027 | 0.0004 | 0.0011 | 0.0003 | 0.0093 | 0.0003 | 0.0000 | 0.0003 |
| 29. | H | 0.0022 | 0.0097 | 0.0003 | 0.0015 | 0.0004 | 0.0031 | 0.0003 | 0.0002 | 0.0000 |
| 30. | H | 0.0013 | 0.0003 | 0.0024 | 0.0028 | 0.0092 | 0.0002 | 0.0000 | 0.0003 | 0.0002 |

| Atom | 10 | 11 | 12 | 13 | 14 | 15 | 16 | 17 | 18 |
|------|----|----|----|----|----|----|----|----|----|
|------|----|----|----|----|----|----|----|----|----|

-----

|    |   |        |        |        |        |        |        |        |        |        |
|----|---|--------|--------|--------|--------|--------|--------|--------|--------|--------|
| 1. | C | 0.0036 | 0.0027 | 0.0055 | 0.0001 | 0.0095 | 0.0061 | 0.0002 | 0.0006 | 0.0002 |
| 2. | C | 0.0106 | 0.0097 | 0.0004 | 0.0002 | 0.0008 | 0.0007 | 0.0002 | 0.0004 | 0.0002 |
| 3. | C | 0.0006 | 0.0146 | 0.0111 | 0.0002 | 0.0190 | 0.0098 | 0.0005 | 0.0006 | 0.0006 |
| 4. | C | 0.0090 | 1.0776 | 0.0025 | 0.0013 | 0.0133 | 0.0138 | 0.0010 | 0.0014 | 0.0017 |
| 5. | C | 0.0039 | 0.0128 | 0.0075 | 0.0004 | 0.0167 | 0.0091 | 0.0009 | 0.0052 | 0.0006 |
| 6. | C | 0.9245 | 0.0096 | 0.0004 | 0.0001 | 0.0009 | 0.0005 | 0.0003 | 0.0010 | 0.0002 |
| 7. | H | 0.0005 | 0.0003 | 0.0001 | 0.0000 | 0.0003 | 0.0002 | 0.0000 | 0.0000 | 0.0000 |
| 8. | H | 0.0006 | 0.0018 | 0.0001 | 0.0000 | 0.0003 | 0.0003 | 0.0000 | 0.0001 | 0.0001 |

|     |   |        |        |        |        |        |        |        |        |        |
|-----|---|--------|--------|--------|--------|--------|--------|--------|--------|--------|
| 9.  | H | 0.0034 | 0.0016 | 0.0003 | 0.0000 | 0.0002 | 0.0003 | 0.0001 | 0.0018 | 0.0004 |
| 10. | H | 0.0000 | 0.0003 | 0.0000 | 0.0000 | 0.0001 | 0.0001 | 0.0000 | 0.0001 | 0.0000 |
| 11. | C | 0.0003 | 0.0000 | 0.2550 | 0.0056 | 1.3735 | 0.1666 | 0.0070 | 0.0160 | 0.0082 |
| 12. | C | 0.0000 | 0.2550 | 0.0000 | 2.3825 | 0.0453 | 0.0511 | 1.0774 | 0.0829 | 0.0192 |
| 13. | C | 0.0000 | 0.0056 | 2.3825 | 0.0000 | 0.0533 | 0.4364 | 0.0306 | 0.0586 | 0.0232 |
| 14. | N | 0.0001 | 1.3735 | 0.0453 | 0.0533 | 0.0000 | 1.1459 | 0.0062 | 0.0076 | 0.0031 |
| 15. | O | 0.0001 | 0.1666 | 0.0511 | 0.4364 | 1.1459 | 0.0000 | 0.0161 | 0.0078 | 0.0041 |
| 16. | C | 0.0000 | 0.0070 | 1.0774 | 0.0306 | 0.0062 | 0.0161 | 0.0000 | 1.6166 | 1.1528 |
| 17. | O | 0.0001 | 0.0160 | 0.0829 | 0.0586 | 0.0076 | 0.0078 | 1.6166 | 0.0000 | 0.1597 |
| 18. | N | 0.0000 | 0.0082 | 0.0192 | 0.0232 | 0.0031 | 0.0041 | 1.1528 | 0.1597 | 0.0000 |
| 19. | C | 0.0000 | 0.0191 | 0.0019 | 0.0016 | 0.9363 | 0.0404 | 0.0004 | 0.0005 | 0.0001 |
| 20. | H | 0.0000 | 0.0002 | 0.0010 | 0.0007 | 0.0000 | 0.0001 | 0.0029 | 0.0149 | 0.8336 |
| 21. | H | 0.0000 | 0.0000 | 0.0118 | 0.0026 | 0.0001 | 0.0005 | 0.0021 | 0.0040 | 0.8288 |
| 22. | H | 0.0000 | 0.0091 | 0.0006 | 0.0008 | 0.0029 | 0.0026 | 0.0001 | 0.0001 | 0.0001 |
| 23. | H | 0.0000 | 0.0009 | 0.0001 | 0.0006 | 0.0027 | 0.0123 | 0.0000 | 0.0001 | 0.0000 |
| 24. | H | 0.0000 | 0.0119 | 0.0035 | 0.0037 | 0.0047 | 0.0026 | 0.0003 | 0.0005 | 0.0002 |
| 25. | H | 0.0000 | 0.0151 | 0.0119 | 0.9111 | 0.0022 | 0.0097 | 0.0031 | 0.0011 | 0.0004 |
| 26. | C | 0.0026 | 0.0006 | 0.0001 | 0.0000 | 0.0002 | 0.0001 | 0.0000 | 0.0000 | 0.0000 |
| 27. | H | 0.0001 | 0.0002 | 0.0004 | 0.0000 | 0.0007 | 0.0004 | 0.0000 | 0.0000 | 0.0000 |
| 28. | H | 0.0003 | 0.0000 | 0.0001 | 0.0000 | 0.0002 | 0.0001 | 0.0000 | 0.0000 | 0.0000 |
| 29. | H | 0.0003 | 0.0000 | 0.0001 | 0.0000 | 0.0001 | 0.0001 | 0.0000 | 0.0000 | 0.0000 |
| 30. | H | 0.0003 | 0.9080 | 0.0017 | 0.0029 | 0.0029 | 0.0041 | 0.0007 | 0.0007 | 0.0005 |

| Atom | 19 | 20 | 21 | 22 | 23 | 24 | 25 | 26 | 27 |
|------|----|----|----|----|----|----|----|----|----|
|------|----|----|----|----|----|----|----|----|----|

-----

|    |   |        |        |        |        |        |        |        |        |        |
|----|---|--------|--------|--------|--------|--------|--------|--------|--------|--------|
| 1. | C | 0.0005 | 0.0000 | 0.0000 | 0.0003 | 0.0001 | 0.0004 | 0.0006 | 1.0355 | 0.0027 |
| 2. | C | 0.0005 | 0.0000 | 0.0000 | 0.0002 | 0.0001 | 0.0000 | 0.0000 | 0.0107 | 0.0112 |
| 3. | C | 0.0011 | 0.0000 | 0.0000 | 0.0004 | 0.0002 | 0.0005 | 0.0010 | 0.0092 | 0.0001 |

4. C 0.0014 0.0000 0.0000 0.0005 0.0007 0.0004 0.0000 0.0016 0.0055  
5. C 0.0019 0.0000 0.0000 0.0006 0.0016 0.0007 0.0008 0.0093 0.0001  
6. C 0.0009 0.0000 0.0000 0.0001 0.0002 0.0000 0.0000 0.0108 0.0108  
7. H 0.0000 0.0000 0.0000 0.0000 0.0000 0.0000 0.0000 0.0026 0.0001  
8. H 0.0000 0.0000 0.0000 0.0000 0.0000 0.0000 0.0000 0.0004 0.0000  
9. H 0.0004 0.0000 0.0000 0.0001 0.0000 0.0001 0.0000 0.0004 0.0000  
10. H 0.0000 0.0000 0.0000 0.0000 0.0000 0.0000 0.0000 0.0026 0.0001  
11. C 0.0191 0.0002 0.0000 0.0091 0.0009 0.0119 0.0151 0.0006 0.0002  
12. C 0.0019 0.0010 0.0118 0.0006 0.0001 0.0035 0.0119 0.0001 0.0004  
13. C 0.0016 0.0007 0.0026 0.0008 0.0006 0.0037 0.9111 0.0000 0.0000  
14. N 0.9363 0.0000 0.0001 0.0029 0.0027 0.0047 0.0022 0.0002 0.0007  
15. O 0.0404 0.0001 0.0005 0.0026 0.0123 0.0026 0.0097 0.0001 0.0004  
16. C 0.0004 0.0029 0.0021 0.0001 0.0000 0.0003 0.0031 0.0000 0.0000  
17. O 0.0005 0.0149 0.0040 0.0001 0.0001 0.0005 0.0011 0.0000 0.0000  
18. N 0.0001 0.8336 0.8288 0.0001 0.0000 0.0002 0.0004 0.0000 0.0000  
19. C 0.0000 0.0000 0.0000 0.9352 0.9366 0.9279 0.0001 0.0000 0.0000  
20. H 0.0000 0.0000 0.0002 0.0000 0.0000 0.0000 0.0000 0.0000 0.0000  
21. H 0.0000 0.0002 0.0000 0.0000 0.0000 0.0000 0.0001 0.0000 0.0000  
22. H 0.9352 0.0000 0.0000 0.0000 0.0007 0.0005 0.0000 0.0000 0.0000  
23. H 0.9366 0.0000 0.0000 0.0007 0.0000 0.0005 0.0000 0.0000 0.0000  
24. H 0.9279 0.0000 0.0000 0.0005 0.0005 0.0000 0.0001 0.0000 0.0000  
25. H 0.0001 0.0000 0.0001 0.0000 0.0000 0.0001 0.0000 0.0000 0.0000  
26. C 0.0000 0.0000 0.0000 0.0000 0.0000 0.0000 0.0000 0.0000 0.9220  
27. H 0.0000 0.0000 0.0000 0.0000 0.0000 0.0000 0.0000 0.9220 0.0000  
28. H 0.0000 0.0000 0.0000 0.0000 0.0000 0.0000 0.0000 0.9401 0.0007  
29. H 0.0000 0.0000 0.0000 0.0000 0.0000 0.0000 0.0000 0.9379 0.0007  
30. H 0.0138 0.0000 0.0000 0.0002 0.0003 0.0001 0.0000 0.0000 0.0001



Atom 28 29 30

-----

|       |        |        |        |
|-------|--------|--------|--------|
| 1. C  | 0.0021 | 0.0022 | 0.0013 |
| 2. C  | 0.0027 | 0.0097 | 0.0003 |
| 3. C  | 0.0004 | 0.0003 | 0.0024 |
| 4. C  | 0.0011 | 0.0015 | 0.0028 |
| 5. C  | 0.0003 | 0.0004 | 0.0092 |
| 6. C  | 0.0093 | 0.0031 | 0.0002 |
| 7. H  | 0.0003 | 0.0003 | 0.0000 |
| 8. H  | 0.0000 | 0.0002 | 0.0003 |
| 9. H  | 0.0003 | 0.0000 | 0.0002 |
| 10. H | 0.0003 | 0.0003 | 0.0003 |
| 11. C | 0.0000 | 0.0000 | 0.9080 |
| 12. C | 0.0001 | 0.0001 | 0.0017 |
| 13. C | 0.0000 | 0.0000 | 0.0029 |
| 14. N | 0.0002 | 0.0001 | 0.0029 |
| 15. O | 0.0001 | 0.0001 | 0.0041 |
| 16. C | 0.0000 | 0.0000 | 0.0007 |
| 17. O | 0.0000 | 0.0000 | 0.0007 |
| 18. N | 0.0000 | 0.0000 | 0.0005 |
| 19. C | 0.0000 | 0.0000 | 0.0138 |
| 20. H | 0.0000 | 0.0000 | 0.0000 |
| 21. H | 0.0000 | 0.0000 | 0.0000 |
| 22. H | 0.0000 | 0.0000 | 0.0002 |
| 23. H | 0.0000 | 0.0000 | 0.0003 |
| 24. H | 0.0000 | 0.0000 | 0.0001 |
| 25. H | 0.0000 | 0.0000 | 0.0000 |
| 26. C | 0.9401 | 0.9379 | 0.0000 |

27. H 0.0007 0.0007 0.0001

28. H 0.0000 0.0006 0.0000

29. H 0.0006 0.0000 0.0000

30. H 0.0000 0.0000 0.0000
